# Supplementary material for: Single-walled carbon nanotube growth using [Fe3(µ3-O)(µ-O2CR)6(L)3]n+complexes as catalyst precursors
Source: Royal Society of Chemistry journal article supplement (doi:10.1039/b512885d), 2005-11-09
Supplement: b512885d.pdf [file b512885d.pdf]

# 308

Proofs to: Prof. A. R. Barron  
Department of Chemistry  
Rice University, MS-60  
6100 Main Street  
Houston, TX 77005

## **Single-Walled Carbon Nanotube Growth using [Fe<sub>3</sub>(μ<sub>3</sub>-O)(μ-O<sub>2</sub>CR)<sub>6</sub>(L)<sub>3</sub>]<sup>n+</sup> Complexes as Catalyst Precursors**

Douglas Ogrin,<sup>a</sup> Ramon Colorado, Jr.,<sup>a</sup> Benji Maruyama,<sup>b</sup> Mark J. Pender,<sup>b</sup> Richard E.  
Smalley,<sup>a,c</sup> and Andrew R. Barron<sup>a\*</sup>

<sup>a</sup> Department of Chemistry and Center for Nanoscale Science and Technology, Rice University,  
Houston, Texas 77005

<sup>b</sup> Materials and Manufacturing Directorate, Air Force Research Laboratory, Wright Patterson  
AFB, Ohio 45433

<sup>c</sup> Carbon Nanotechnology Laboratory, Rice University, Houston, Texas 77005

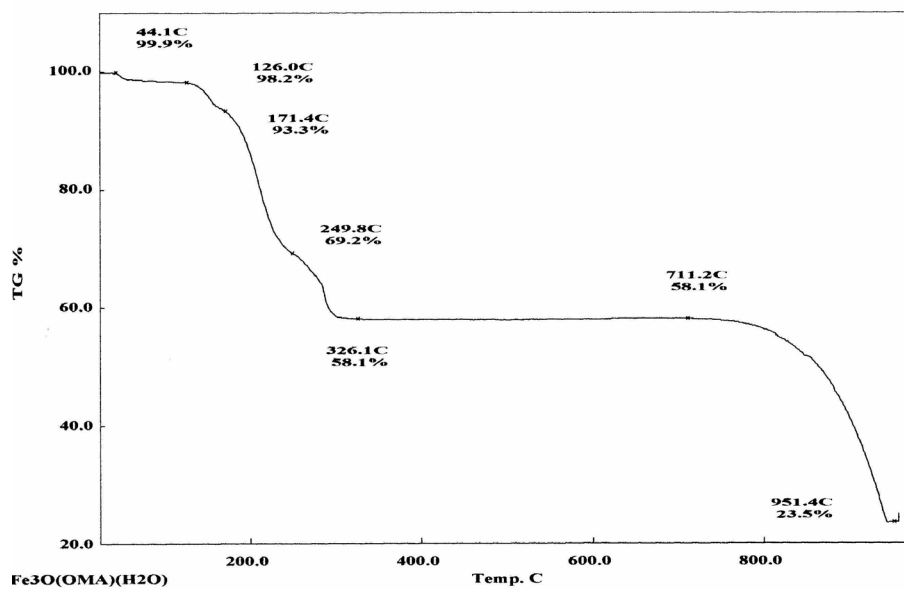

**Fig. S1.** TGA plot for  $[\text{Fe}_3\text{O}(\text{O}_2\text{CCH}_2\text{OMe})_6(\text{H}_2\text{O})_3][\text{FeCl}_4]$  (2).

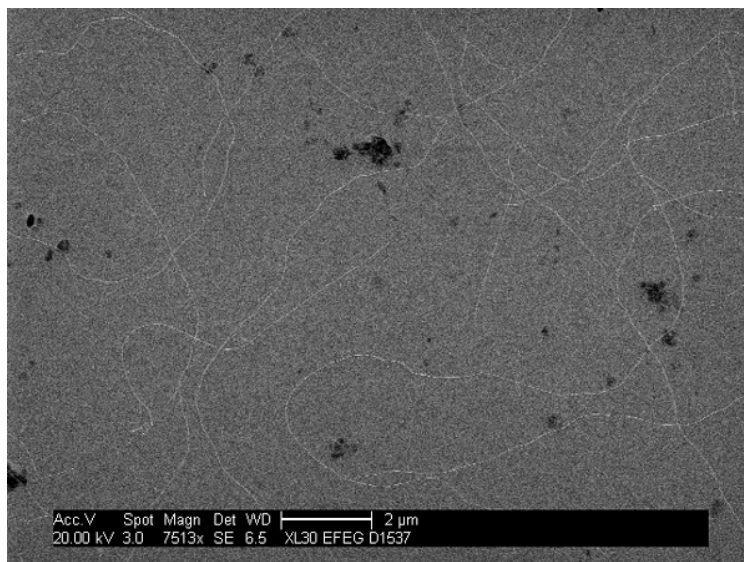

**Fig. S2.** A SEM micrograph of SWNTs grown on SOG substrate from  $[\text{Fe}_3\text{O}(\text{O}_2\text{CCH}_2\text{OMe})_6(\text{EtOH})_3]$  (**1**) using  $\text{CH}_4/\text{H}_2$  (1:1) at 800 °C.

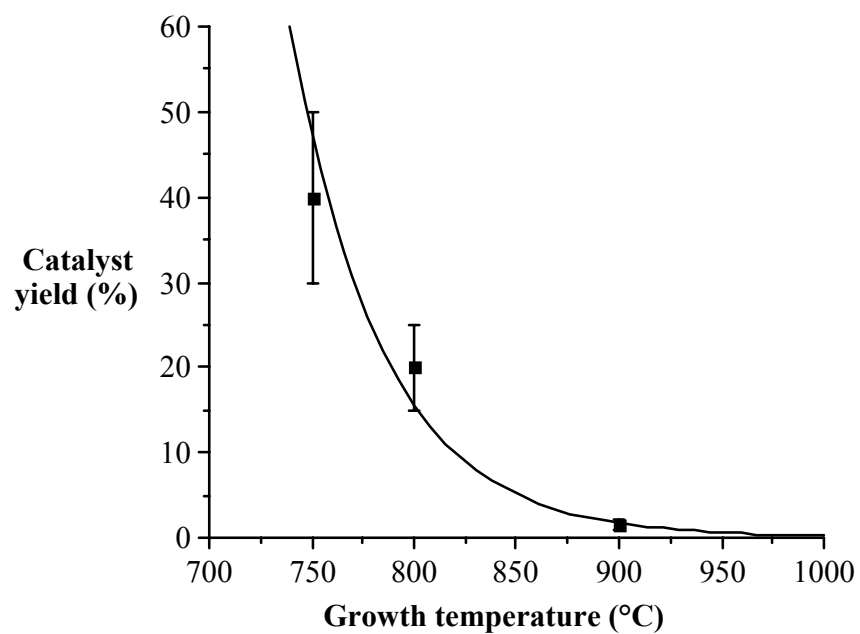

**Fig. S3.** Plot of percentage of active catalysts as a function of growth temperature.  $y = (9.84 \times 10^8)(10^{-0.0097x})$ ,  $R^2 = 0.98$ .
